# Supplementary material for: Strain manipulation of the local spin flip on Ni@B80 endohedral fullerene
Source: Royal Society of Chemistry journal article supplement (doi:10.1039/d1cp03206b), 2021-01-01
Supplement: d1cp03206b1.pdf [file d1cp03206b1.pdf]

## Supplementary Information:

### Strain manipulation of the local spin flip on Ni@B<sub>80</sub> endohedral fullerene

Shuai Xu,<sup>‡a</sup> Yiming Zhang,<sup>‡a</sup> Rui Huang,<sup>b</sup> Jing Liu,<sup>c</sup> Wei Jin,<sup>d</sup> Georgios Lefkidis,<sup>ac</sup> Wolfgang Hübner<sup>c</sup>  
and Chun Li<sup>\*a</sup>

<sup>a</sup> School of Mechanics, Civil Engineering and Architecture, Northwestern Polytechnical University, Xi'an 710072, China.

<sup>b</sup> Envision-group, SOHO Zhongshan Plaza, Shanghai 200051, China

<sup>c</sup> Department of Physics and Research Center OPTIMAS, Technische Universität Kaiserslautern, PO Box 3049, 67653 Kaiserslautern, Germany.

<sup>d</sup> School of Physics and Information Technology, Shaanxi Normal University, Xi'an 710119, China.

\*Corresponding author: lichun@nwpu.edu.cn

#### SI. Cartesian coordinates of the equilibrium Ni@B<sub>80</sub> structure and the distorted structures

In Tables S1-S3, the Cartesian coordinates of the distorted Ni@B<sub>80</sub> structures under D1-, D2-, and D3-types strains are listed respectively, together with that of the equilibrium structure. Thereinto, the first columns of each table list the labels of B atoms (1-80) and the Ni (81) atom. And the coordinates of equilibrium structure, distorted structure under 0.5%, and 1.0% strains are listed successively. The coordinates of Ni atoms in each structure are highlighted with **bold blue**. Meanwhile, the coordinates of the atoms on which the strains applied are highlighted with **bold italic red**. In structures under D1-type strains, the strains are applied on atoms with labels 65 and 75, respectively. The distance between atoms 65 and 75 in equilibrium is about 8.0408 Å, and this value is enhanced to 8.0810 Å and 8.1212 Å respectively under 0.5% and 1.0% D1-type strains. This indicates the different magnitudes of D1-type strains are simulated through adjusting the coordinates of corresponding atoms, and then freezing the distances between them. Similarly, the corresponding atoms for structures under D2-type strains are atoms 68 and 78. And the distances between them are 8.2410 Å, 8.2551 Å, and 8.2961 Å in equilibrium structure, distorted structures under 0.5% strain, and under 1.0% strains, respectively. It indicates that the simulation of the D2-types strains is achieved. In addition, it is notable that in scenarios under D3-type strains there is 10 corresponding atoms in total on which strains are applied. Here the corresponding relationship is that atoms 48-14, 58-24, 54-28, 44-18 and 39-9 respectively, and the distances between each pair of atoms are adjusted to simulate the D3-type strains. As a result, the distance between pentagons 48-58-54-44-39 and 14-24-28-18-9 are adjusted in proportion to the 0.5% and 1.0% tensile strains, and then the simulation of D3-type strains is achieved.

**Table S1** The Cartesian coordinates of the optimized equilibrium Ni@B<sub>80</sub> structure and the distorted structures with D1-type tensile strains are applied, the first column denotes the labels of the B (1-80) and Ni (81) atoms.

| Label | Equilibrium Structure |         |         | 0.5% D1-type Strain |         |         | 1.0% D1-type Strain |         |         |
|-------|-----------------------|---------|---------|---------------------|---------|---------|---------------------|---------|---------|
|       | X                     | Y       | Z       | X                   | Y       | Z       | X                   | Y       | Z       |
| 1     | 4.0722                | -0.2171 | 0.0000  | 0.1884              | 4.0257  | 0.6346  | 0.1449              | 3.9790  | 0.9075  |
| 2     | 3.7293                | -1.2431 | 1.4005  | 1.2207              | 3.4750  | 1.9639  | 1.1871              | 3.3480  | 2.1955  |
| 3     | 3.0956                | -2.6601 | 0.9494  | 2.6408              | 2.9292  | 1.4173  | 2.6115              | 2.8563  | 1.6092  |
| 4     | 3.0956                | -2.6601 | -0.9494 | 2.6355              | 3.2267  | -0.4577 | 2.5983              | 3.2823  | -0.2413 |
| 5     | 3.7293                | -1.2431 | -1.4005 | 1.2126              | 3.9126  | -0.8012 | 1.1659              | 3.9730  | -0.5326 |
| 6     | 3.9092                | 1.3395  | 0.0000  | -1.3668             | 3.8533  | 0.6115  | -1.4088             | 3.7908  | 0.8756  |
| 7     | 3.1373                | -0.4519 | 2.6885  | 0.4371              | 2.6821  | 3.1439  | 0.4153              | 2.4660  | 3.3182  |
| 8     | 1.8551                | -3.3205 | 1.7933  | 3.3114              | 1.5762  | 2.0555  | 3.2979              | 1.4695  | 2.1514  |
| 9     | 1.8551                | -3.3205 | -1.7933 | 3.3013              | 2.1376  | -1.4859 | 3.2719              | 2.2727  | -1.3422 |
| 10    | 3.1373                | -0.4519 | -2.6885 | 0.4215              | 3.5234  | -2.1652 | 0.3745              | 3.6695  | -1.9193 |
| 11    | 3.3575                | 2.2636  | 1.4081  | -2.2831             | 3.0809  | 1.9187  | -2.3123             | 2.9186  | 2.1300  |
| 12    | 1.9000                | -1.0742 | 3.5238  | 1.0699              | 1.3335  | 3.7747  | 1.0639              | 1.0837  | 3.8529  |
| 13    | 0.4835                | -3.9384 | 0.8109  | 3.9356              | 0.3791  | 0.8702  | 3.9308              | 0.3627  | 0.8870  |
| 14    | 1.2218                | -2.4679 | -3.0489 | 2.4499              | 1.7024  | -2.8232 | 2.4221              | 1.9207  | -2.7037 |
| 15    | 2.9499                | 1.3671  | -2.7092 | -1.3934             | 3.3288  | -2.2122 | -1.4342             | 3.4588  | -1.9764 |
| 16    | 2.9499                | 1.3671  | 2.7092  | -1.3934             | 2.4807  | 3.1380  | -1.3986             | 2.2453  | 3.3022  |
| 17    | 1.2218                | -2.4679 | 3.0489  | 2.4666              | 0.7478  | 3.1975  | 2.4649              | 0.5547  | 3.2346  |
| 18    | 0.4835                | -3.9384 | -0.8109 | 3.9311              | 0.6329  | -0.7310 | 3.9190              | 0.7256  | -0.6927 |
| 19    | 1.9000                | -1.0742 | -3.5238 | 1.0509              | 2.4372  | -3.1852 | 1.0155              | 2.6644  | -3.0135 |
| 20    | 3.3575                | 2.2636  | -1.4081 | -2.2899             | 3.5210  | -0.8614 | -2.3304             | 3.5473  | -0.6131 |
| 21    | 2.3660                | 3.4491  | 0.9142  | -3.4628             | 2.1697  | 1.2779  | -3.4829             | 2.0395  | 1.4294  |
| 22    | 0.7891                | 0.2135  | 4.0090  | -0.2081             | 0.1507  | 4.0824  | -0.1987             | -0.1325 | 4.0819  |
| 23    | -0.9428               | -3.5246 | 1.7418  | 3.5349              | -1.1791 | 1.5675  | 3.5512              | -1.2452 | 1.4768  |
| 24    | -0.5878               | -2.6373 | -3.0629 | 2.6322              | -0.0822 | -3.1202 | 2.6232              | 0.1614  | -3.1215 |
| 25    | 1.6157                | 1.7157  | -3.5717 | -1.7361             | 2.1437  | -3.2725 | -1.7690             | 2.3461  | -3.1156 |
| 26    | 1.6157                | 1.7157  | 3.5717  | -1.7167             | 1.0251  | 3.7816  | -1.7169             | 0.7446  | 3.8441  |
| 27    | -0.5878               | -2.6373 | 3.0629  | 2.6487              | -1.0414 | 2.9286  | 2.6671              | -1.2112 | 2.8447  |
| 28    | -0.9428               | -3.5246 | -1.7418 | 3.5256              | -0.6334 | -1.8728 | 3.5261              | -0.4642 | -1.9170 |
| 29    | 0.7891                | 0.2135  | -4.0090 | -0.2297             | 1.4058  | -3.8362 | -0.2554             | 1.6646  | -3.7320 |
| 30    | 2.3660                | 3.4491  | -0.9142 | -3.4675             | 2.4562  | -0.5276 | -3.4960             | 2.4493  | -0.3523 |
| 31    | -4.0665               | 0.4579  | 0.0000  | -0.4293             | -4.0220 | -0.6335 | -0.3858             | -3.9782 | -0.9061 |
| 32    | -3.7136               | 1.4806  | -1.4050 | -1.4581             | -3.4605 | -1.9657 | -1.4241             | -3.3362 | -2.1963 |
| 33    | -3.0110               | 2.8587  | -0.9162 | -2.8395             | -2.8520 | -1.3710 | -2.8102             | -2.7843 | -1.5578 |
| 34    | -3.0110               | 2.8587  | 0.9162  | -2.8342             | -3.1390 | 0.4385  | -2.7974             | -3.1949 | 0.2280  |
| 35    | -3.7136               | 1.4806  | 1.4050  | -1.4499             | -3.8994 | 0.8085  | -1.4030             | -3.9625 | 0.5411  |
| 36    | -3.9163               | -1.0994 | 0.0000  | 1.1268              | -3.8623 | -0.6125 | 1.1690              | -3.8024 | -0.8770 |
| 37    | -3.1336               | 0.6950  | -2.7106 | -0.6800             | -2.6768 | -3.1652 | -0.6577             | -2.4621 | -3.3392 |
| 38    | -1.7743               | 3.4976  | -1.7616 | -3.4889             | -1.5024 | -2.0114 | -3.4755             | -1.4005 | -2.1023 |
| 39    | -1.7743               | 3.4976  | 1.7616  | -3.4790             | -2.0538 | 1.4676  | -3.4504             | -2.1890 | 1.3297  |
| 40    | -3.1336               | 0.6950  | 2.7106  | -0.6645             | -3.5249 | 2.1881  | -0.6174             | -3.6751 | 1.9425  |
| 41    | -3.3497               | -2.0145 | -1.4286 | 2.0340              | -3.0718 | -1.9375 | 2.0634              | -2.9106 | -2.1479 |
| 42    | -1.9013               | 1.3288  | -3.5683 | -1.3243             | -1.3294 | -3.8184 | -1.3180             | -1.0794 | -3.8960 |

|           |                |                |                |                |                |                |                |                |                |
|-----------|----------------|----------------|----------------|----------------|----------------|----------------|----------------|----------------|----------------|
| 43        | -0.4238        | 4.0940         | -0.7819        | -4.0915        | -0.3258        | -0.8321        | -4.0869        | -0.3138        | -0.8449        |
| 44        | -1.2036        | 2.7156         | 3.0612         | -2.6977        | -1.6879        | 2.8389         | -2.6698        | -1.9095        | 2.7208         |
| 45        | -2.9507        | -1.1329        | 2.7292         | 1.1593         | -3.3340        | 2.2322         | 1.2003         | -3.4679        | 1.9962         |
| 46        | -2.9507        | -1.1329        | -2.7292        | 1.1458         | -2.4798        | -3.1577        | 1.1650         | -2.2453        | -3.3218        |
| 47        | -1.2036        | 2.7156         | -3.0612        | -2.7143        | -0.7295        | -3.2067        | -2.7125        | -0.5385        | -3.2427        |
| 48        | -0.4238        | 4.0940         | 0.7819         | -4.0874        | -0.5705        | 0.7122         | -4.0760        | -0.6634        | 0.6787         |
| 49        | -1.9013        | 1.3288         | 3.5683         | -1.3051        | -2.4469        | 3.2292         | -1.2693        | -2.6793        | 3.0568         |
| 50        | -3.3497        | -2.0145        | 1.4286         | 2.0408         | -3.5182        | 0.8832         | 2.0810         | -3.5484        | 0.6352         |
| 51        | -2.3246        | -3.1689        | -0.8834        | 3.1824         | -2.1354        | -1.2407        | 3.2024         | -2.0106        | -1.3895        |
| 52        | -0.7710        | 0.0461         | -4.0184        | -0.0513        | -0.1330        | -4.0885        | -0.0604        | 0.1479         | -4.0864        |
| 53        | 1.0197         | 3.8028         | -1.7614        | -3.8130        | 1.2557         | -1.5740        | -3.8292        | 1.3186         | -1.4772        |
| 54        | 0.6320         | 2.9165         | 3.0613         | -2.9115        | 0.1244         | 3.1259         | -2.9028        | -0.1223        | 3.1309         |
| 55        | -1.5968        | -1.4579        | 3.5512         | 1.4783         | -2.1235        | 3.2557         | 1.5112         | -2.3278        | 3.1005         |
| 56        | -1.5968        | -1.4579        | -3.5512        | 1.4590         | -1.0112        | -3.7582        | 1.4595         | -0.7349        | -3.8196        |
| 57        | 0.6320         | 2.9165         | -3.0613        | -2.9278        | 1.0828         | -2.9196        | -2.9460        | 1.2488         | -2.8325        |
| 58        | 1.0197         | 3.8028         | 1.7614         | -3.8040        | 0.7042         | 1.9043         | -3.8050        | 0.5301         | 1.9539         |
| 59        | -0.7710        | 0.0461         | 4.0184         | -0.0297        | -1.3910        | 3.8486         | -0.0037        | -1.6532        | 3.7453         |
| 60        | -2.3246        | -3.1689        | 0.8834         | 3.1870         | -2.4124        | 0.5042         | 3.2151         | -2.4070        | 0.3325         |
| 61        | 3.7491         | 0.5389         | 1.4142         | -0.5613        | 3.4792         | 1.9824         | -0.5948        | 3.3298         | 2.2159         |
| 62        | 2.0451         | -1.5344        | 1.8266         | 1.5244         | 1.7460         | 2.1203         | 1.5094         | 1.6149         | 2.2301         |
| 63        | 1.9162         | -3.4150        | 0.0000         | 3.4004         | 1.9175         | 0.2941         | 3.3777         | 1.9315         | 0.4174         |
| 64        | 2.0451         | -1.5344        | -1.8266        | 1.5130         | 2.3184         | -1.4860        | 1.4806         | 2.4344         | -1.3261        |
| <b>65</b> | <b>3.7491</b>  | <b>0.5389</b>  | <b>-1.4142</b> | <b>-0.5711</b> | <b>3.9401</b>  | <b>-0.8127</b> | <b>-0.6197</b> | <b>3.9999</b>  | <b>-0.5403</b> |
| 66        | 1.6699         | 2.1801         | 1.8775         | -2.1861        | 1.3409         | 2.1178         | -2.1945        | 1.1698         | 2.2075         |
| 67        | 0.1571         | -1.2624        | 3.8176         | 1.2716         | -0.4332        | 3.7928         | 1.2864         | -0.6788        | 3.7504         |
| 68        | -0.9686        | -3.9594        | 0.0000         | 3.9651         | -0.9281        | -0.1572        | 3.9733         | -0.8704        | -0.2264        |
| 69        | 0.1571         | -1.2624        | -3.8176        | 1.2510         | 0.7621         | -3.7475        | 1.2326         | 1.0325         | -3.6876        |
| 70        | 1.6699         | 2.1801         | -1.8775        | -2.1949        | 1.9295         | -1.5893        | -2.2181        | 2.0123         | -1.4489        |
| 71        | -3.7306        | -0.2873        | -1.4186        | 0.3097         | -3.4618        | -1.9836        | 0.3433         | -3.3146        | -2.2156        |
| 72        | -2.0520        | 1.7657         | -1.8762        | -1.7556        | -1.7470        | -2.1703        | -1.7404        | -1.6153        | -2.2805        |
| 73        | -1.8075        | 3.6845         | 0.0000         | -3.6705        | -1.8123        | -0.2767        | -3.6488        | -1.8304        | -0.3928        |
| 74        | -2.0520        | 1.7657         | 1.8762         | -1.7441        | -2.3347        | 1.5344         | -1.7110        | -2.4557        | 1.3733         |
| <b>75</b> | <b>-3.7306</b> | <b>-0.2873</b> | <b>1.4186</b>  | <b>0.3194</b>  | <b>-3.9240</b> | <b>0.8204</b>  | <b>0.3679</b>  | <b>-3.9870</b> | <b>0.5493</b>  |
| 76        | -1.6149        | -1.8551        | -1.8380        | 1.8609         | -1.2948        | -2.0699        | 1.8689         | -1.1303        | -2.1559        |
| 77        | -0.1438        | 1.5506         | -3.7376        | -1.5589        | 0.4319         | -3.7110        | -1.5726        | 0.6689         | -3.6688        |
| 78        | 1.0053         | 4.0139         | 0.0000         | -4.0198        | 0.9642         | 0.1631         | -4.0281        | 0.9061         | 0.2353         |
| 79        | -0.1438        | 1.5506         | 3.7376         | -1.5388        | -0.7384        | 3.6707         | -1.5200        | -1.0064        | 3.6131         |
| 80        | -1.6149        | -1.8551        | 1.8380         | 1.8698         | -1.8710        | 1.5595         | 1.8925         | -1.9557        | 1.4236         |
| <b>81</b> | <b>-0.2213</b> | <b>-1.7326</b> | <b>0.0000</b>  | <b>1.7326</b>  | <b>-0.2070</b> | <b>-0.0370</b> | <b>1.7324</b>  | <b>-0.1866</b> | <b>-0.0528</b> |

**Table S2** The Cartesian coordinates of the optimized equilibrium Ni@B<sub>80</sub> structure and the distorted structures with D2-type tensile strains are applied, the first column denotes the labels of the B (1-80) and Ni (81) atoms.

| Label | Equilibrium Structure |         |         | 0.5% D2-type Strain |         |         | 1.0% D2-type Strain |         |         |
|-------|-----------------------|---------|---------|---------------------|---------|---------|---------------------|---------|---------|
|       | X                     | Y       | Z       | X                   | Y       | Z       | X                   | Y       | Z       |
| 1     | 4.0722                | -0.2171 | 0.0000  | 4.0743              | -0.1567 | 0.0000  | -0.1039             | 4.0752  | 0.0000  |
| 2     | 3.7293                | -1.2431 | 1.4005  | 3.7451              | -1.1888 | 1.3992  | -1.1411             | 3.7582  | -1.3982 |
| 3     | 3.0956                | -2.6601 | 0.9494  | 3.1333              | -2.6161 | 0.9489  | -2.5769             | 3.1653  | -0.9483 |
| 4     | 3.0956                | -2.6601 | -0.9494 | 3.1333              | -2.6161 | -0.9489 | -2.5769             | 3.1653  | 0.9483  |
| 5     | 3.7293                | -1.2431 | -1.4005 | 3.7451              | -1.1888 | -1.3992 | -1.1411             | 3.7582  | 1.3982  |
| 6     | 3.9092                | 1.3395  | 0.0000  | 3.8910              | 1.3981  | 0.0000  | 1.4493              | 3.8748  | 0.0000  |
| 7     | 3.1373                | -0.4519 | 2.6885  | 3.1420              | -0.4061 | 2.6865  | -0.3659             | 3.1456  | -2.6847 |
| 8     | 1.8551                | -3.3205 | 1.7933  | 1.9029              | -3.2946 | 1.7929  | -3.2716             | 1.9439  | -1.7923 |
| 9     | 1.8551                | -3.3205 | -1.7933 | 1.9029              | -3.2946 | -1.7929 | -3.2716             | 1.9439  | 1.7923  |
| 10    | 3.1373                | -0.4519 | -2.6885 | 3.1420              | -0.4061 | -2.6865 | -0.3659             | 3.1456  | 2.6847  |
| 11    | 3.3575                | 2.2636  | 1.4081  | 3.3254              | 2.3149  | 1.4079  | 2.3598              | 3.2970  | -1.4079 |
| 12    | 1.9000                | -1.0742 | 3.5238  | 1.9142              | -1.0460 | 3.5220  | -1.0213             | 1.9262  | -3.5201 |
| 13    | 0.4835                | -3.9384 | 0.8109  | 0.5390              | -3.9350 | 0.8113  | -3.9319             | 0.5874  | -0.8117 |
| 14    | 1.2218                | -2.4679 | -3.0489 | 1.2565              | -2.4499 | -3.0473 | -2.4341             | 1.2867  | 3.0462  |
| 15    | 2.9499                | 1.3671  | -2.7092 | 2.9293              | 1.4112  | -2.7077 | 1.4500              | 2.9108  | 2.7062  |
| 16    | 2.9499                | 1.3671  | 2.7092  | 2.9293              | 1.4112  | 2.7077  | 1.4500              | 2.9108  | -2.7062 |
| 17    | 1.2218                | -2.4679 | 3.0489  | 1.2565              | -2.4499 | 3.0473  | -2.4341             | 1.2867  | -3.0462 |
| 18    | 0.4835                | -3.9384 | -0.8109 | 0.5390              | -3.9350 | -0.8113 | -3.9319             | 0.5874  | 0.8117  |
| 19    | 1.9000                | -1.0742 | -3.5238 | 1.9142              | -1.0460 | -3.5220 | -1.0213             | 1.9262  | 3.5201  |
| 20    | 3.3575                | 2.2636  | -1.4081 | 3.3254              | 2.3149  | -1.4079 | 2.3598              | 3.2970  | 1.4079  |
| 21    | 2.3660                | 3.4491  | 0.9142  | 2.3158              | 3.4845  | 0.9117  | 3.5152              | 2.2714  | -0.9091 |
| 22    | 0.7891                | 0.2135  | 4.0090  | 0.7859              | 0.2255  | 4.0066  | 0.2359              | 0.7829  | -4.0041 |
| 23    | -0.9428               | -3.5246 | 1.7418  | -0.8925             | -3.5416 | 1.7415  | -3.5556             | -0.8481 | -1.7411 |
| 24    | -0.5878               | -2.6373 | -3.0629 | -0.5497             | -2.6467 | -3.0616 | -2.6547             | -0.5164 | 3.0608  |
| 25    | 1.6157                | 1.7157  | -3.5717 | 1.5909              | 1.7406  | -3.5698 | 1.7621              | 1.5690  | 3.5681  |
| 26    | 1.6157                | 1.7157  | 3.5717  | 1.5909              | 1.7406  | 3.5698  | 1.7621              | 1.5690  | -3.5681 |
| 27    | -0.5878               | -2.6373 | 3.0629  | -0.5497             | -2.6467 | 3.0616  | -2.6547             | -0.5164 | -3.0608 |
| 28    | -0.9428               | -3.5246 | -1.7418 | -0.8925             | -3.5416 | -1.7415 | -3.5556             | -0.8481 | 1.7411  |
| 29    | 0.7891                | 0.2135  | -4.0090 | 0.7859              | 0.2255  | -4.0066 | 0.2359              | 0.7829  | 4.0041  |
| 30    | 2.3660                | 3.4491  | -0.9142 | 2.3158              | 3.4845  | -0.9117 | 3.5152              | 2.2714  | 0.9091  |
| 31    | -4.0665               | 0.4579  | 0.0000  | -4.0716             | 0.3991  | 0.0000  | 0.3475              | -4.0744 | 0.0000  |
| 32    | -3.7136               | 1.4806  | -1.4050 | -3.7332             | 1.4274  | -1.4045 | 1.3807              | -3.7490 | 1.4037  |
| 33    | -3.0110               | 2.8587  | -0.9162 | -3.0507             | 2.8162  | -0.9162 | 2.7793              | -3.0853 | 0.9163  |
| 34    | -3.0110               | 2.8587  | 0.9162  | -3.0507             | 2.8162  | 0.9162  | 2.7793              | -3.0853 | -0.9163 |
| 35    | -3.7136               | 1.4806  | 1.4050  | -3.7332             | 1.4274  | 1.4045  | 1.3807              | -3.7490 | -1.4037 |
| 36    | -3.9163               | -1.0994 | 0.0000  | -3.9005             | -1.1564 | 0.0000  | -1.2062             | -3.8851 | 0.0000  |
| 37    | -3.1336               | 0.6950  | -2.7106 | -3.1424             | 0.6506  | -2.7098 | 0.6115              | -3.1491 | 2.7086  |
| 38    | -1.7743               | 3.4976  | -1.7616 | -1.8246             | 3.4750  | -1.7618 | 3.4551              | -1.8686 | 1.7620  |
| 39    | -1.7743               | 3.4976  | 1.7616  | -1.8246             | 3.4750  | 1.7618  | 3.4551              | -1.8686 | -1.7620 |
| 40    | -3.1336               | 0.6950  | 2.7106  | -3.1424             | 0.6506  | 2.7098  | 0.6115              | -3.1491 | -2.7086 |
| 41    | -3.3497               | -2.0145 | -1.4286 | -3.3204             | -2.0642 | -1.4285 | -2.1075             | -3.2941 | 1.4283  |
| 42    | -1.9013               | 1.3288  | -3.5683 | -1.9191             | 1.3021  | -3.5671 | 1.2788              | -1.9342 | 3.5658  |

|           |                |                |               |                |                |               |                |                |               |
|-----------|----------------|----------------|---------------|----------------|----------------|---------------|----------------|----------------|---------------|
| 43        | -0.4238        | 4.0940         | -0.7819       | -0.4812        | 4.0918         | -0.7820       | 4.0893         | -0.5310        | 0.7821        |
| 44        | -1.2036        | 2.7156         | 3.0612        | -1.2419        | 2.6999         | 3.0610        | 2.6858         | -1.2753        | -3.0606       |
| 45        | -2.9507        | -1.1329        | 2.7292        | -2.9334        | -1.1759        | 2.7281        | -1.2134        | -2.9176        | -2.7269       |
| 46        | -2.9507        | -1.1329        | -2.7292       | -2.9334        | -1.1759        | -2.7281       | -1.2134        | -2.9176        | 2.7269        |
| 47        | -1.2036        | 2.7156         | -3.0612       | -1.2419        | 2.6999         | -3.0610       | 2.6858         | -1.2753        | 3.0606        |
| 48        | -0.4238        | 4.0940         | 0.7819        | -0.4812        | 4.0918         | 0.7820        | 4.0893         | -0.5310        | -0.7821       |
| 49        | -1.9013        | 1.3288         | 3.5683        | -1.9191        | 1.3021         | 3.5671        | 1.2788         | -1.9342        | -3.5658       |
| 50        | -3.3497        | -2.0145        | 1.4286        | -3.3204        | -2.0642        | 1.4285        | -2.1075        | -3.2941        | -1.4283       |
| 51        | -2.3246        | -3.1689        | -0.8834       | -2.2796        | -3.2055        | -0.8829       | -3.2374        | -2.2399        | 0.8823        |
| 52        | -0.7710        | 0.0461         | -4.0184       | -0.7713        | 0.0353         | -4.0155       | 0.0262         | -0.7714        | 4.0131        |
| 53        | 1.0197         | 3.8028         | -1.7614       | 0.9635         | 3.8181         | -1.7596       | 3.8310         | 0.9141         | 1.7579        |
| 54        | 0.6320         | 2.9165         | 3.0613        | 0.5904         | 2.9277         | 3.0609        | 2.9371         | 0.5540         | -3.0605       |
| 55        | -1.5968        | -1.4579        | 3.5512        | -1.5747        | -1.4810        | 3.5492        | -1.5010        | -1.5553        | -3.5474       |
| 56        | -1.5968        | -1.4579        | -3.5512       | -1.5747        | -1.4810        | -3.5492       | -1.5010        | -1.5553        | 3.5474        |
| 57        | 0.6320         | 2.9165         | -3.0613       | 0.5904         | 2.9277         | -3.0609       | 2.9371         | 0.5540         | 3.0605        |
| 58        | 1.0197         | 3.8028         | 1.7614        | 0.9635         | 3.8181         | 1.7596        | 3.8310         | 0.9141         | -1.7579       |
| 59        | -0.7710        | 0.0461         | 4.0184        | -0.7713        | 0.0353         | 4.0155        | 0.0262         | -0.7714        | -4.0131       |
| 60        | -2.3246        | -3.1689        | 0.8834        | -2.2796        | -3.2055        | 0.8829        | -3.2374        | -2.2399        | -0.8823       |
| 61        | 3.7491         | 0.5389         | 1.4142        | 3.7405         | 0.5950         | 1.4137        | 0.6439         | 3.7318         | -1.4131       |
| 62        | 2.0451         | -1.5344        | 1.8266        | 2.0648         | -1.5048        | 1.8241        | -1.4791        | 2.0821         | -1.8223       |
| 63        | 1.9162         | -3.4150        | 0.0000        | 1.9637         | -3.3880        | 0.0000        | -3.3643        | 2.0054         | 0.0000        |
| 64        | 2.0451         | -1.5344        | -1.8266       | 2.0648         | -1.5048        | -1.8241       | -1.4791        | 2.0821         | 1.8223        |
| 65        | 3.7491         | 0.5389         | -1.4142       | 3.7405         | 0.5950         | -1.4137       | 0.6439         | 3.7318         | 1.4131        |
| 66        | 1.6699         | 2.1801         | 1.8775        | 1.6381         | 2.2072         | 1.8746        | 2.2308         | 1.6098         | -1.8716       |
| 67        | 0.1571         | -1.2624        | 3.8176        | 0.1751         | -1.2603        | 3.8164        | -1.2579        | 0.1905         | -3.8147       |
| <b>68</b> | <b>-0.9686</b> | <b>-3.9594</b> | <b>0.0000</b> | <b>-0.9135</b> | <b>-3.9880</b> | <b>0.0000</b> | <b>-4.0146</b> | <b>-0.8653</b> | <b>0.0000</b> |
| 69        | 0.1571         | -1.2624        | -3.8176       | 0.1751         | -1.2603        | -3.8164       | -1.2579        | 0.1905         | 3.8147        |
| 70        | 1.6699         | 2.1801         | -1.8775       | 1.6381         | 2.2072         | -1.8746       | 2.2308         | 1.6098         | 1.8716        |
| 71        | -3.7306        | -0.2873        | -1.4186       | -3.7231        | -0.3417        | -1.4179       | -0.3891        | -3.7168        | 1.4174        |
| 72        | -2.0520        | 1.7657         | -1.8762       | -2.0762        | 1.7382         | -1.8759       | 1.7141         | -2.0969        | 1.8754        |
| 73        | -1.8075        | 3.6845         | 0.0000        | -1.8588        | 3.6577         | 0.0000        | 3.6333         | -1.9030        | 0.0000        |
| 74        | -2.0520        | 1.7657         | 1.8762        | -2.0762        | 1.7382         | 1.8759        | 1.7141         | -2.0969        | -1.8754       |
| 75        | -3.7306        | -0.2873        | 1.4186        | -3.7231        | -0.3417        | 1.4179        | -0.3891        | -3.7168        | -1.4174       |
| 76        | -1.6149        | -1.8551        | -1.8380       | -1.5876        | -1.8810        | -1.8360       | -1.9035        | -1.5634        | 1.8339        |
| 77        | -0.1438        | 1.5506         | -3.7376       | -0.1654        | 1.5489         | -3.7356       | 1.5476         | -0.1837        | 3.7338        |
| <b>78</b> | <b>1.0053</b>  | <b>4.0139</b>  | <b>0.0000</b> | <b>0.9505</b>  | <b>4.0539</b>  | <b>0.0000</b> | <b>4.0911</b>  | <b>0.9020</b>  | <b>0.0000</b> |
| 79        | -0.1438        | 1.5506         | 3.7376        | -0.1654        | 1.5489         | 3.7356        | 1.5476         | -0.1837        | -3.7338       |
| 80        | -1.6149        | -1.8551        | 1.8380        | -1.5876        | -1.8810        | 1.8360        | -1.9035        | -1.5634        | -1.8339       |
| <b>81</b> | <b>-0.2213</b> | <b>-1.7326</b> | <b>0.0000</b> | <b>-0.1975</b> | <b>-1.7432</b> | <b>0.0000</b> | <b>-1.7530</b> | <b>-0.1769</b> | <b>0.0000</b> |

**Table S3** The Cartesian coordinates of the optimized equilibrium Ni@B<sub>80</sub> structure and the distorted structures with D3-type tensile strains are applied, the first column denotes the labels of the B (1-80) and Ni (81) atoms.

| Label     | Equilibrium Structure |                |                | 0.5% D3-type Strain |                |                | 1.0% D3-type Strain |                |                |
|-----------|-----------------------|----------------|----------------|---------------------|----------------|----------------|---------------------|----------------|----------------|
|           | X                     | Y              | Z              | X                   | Y              | Z              | X                   | Y              | Z              |
| 1         | 4.0722                | -0.2171        | 0.0000         | 0.3035              | 1.9399         | 3.5666         | 0.4613              | 1.6090         | 3.6996         |
| 2         | 3.7293                | -1.2431        | 1.4005         | 1.1860              | 0.4627         | 3.9690         | 1.2535              | 0.0539         | 3.9598         |
| 3         | 3.0956                | -2.6601        | 0.9494         | 2.6261              | 0.4205         | 3.2348         | 2.6751              | -0.0088        | 3.1922         |
| 4         | 3.0956                | -2.6601        | -0.9494        | 2.8103              | 2.0766         | 2.3193         | 2.9662              | 1.7067         | 2.4292         |
| 5         | 3.7293                | -1.2431        | -1.4005        | 1.4516              | 2.9004         | 2.6194         | 1.6592              | 2.5779         | 2.8232         |
| 6         | 3.9092                | 1.3395         | 0.0000         | -1.2498             | 2.0037         | 3.3830         | -1.0874             | 1.7809         | 3.5479         |
| 7         | 3.1373                | -0.4519        | 2.6885         | 0.2636              | -0.8716        | 4.0499         | 0.2505              | -1.2245        | 3.9466         |
| 8         | 1.8551                | -3.3205        | 1.7933         | 3.1767              | -0.9726        | 2.5731         | 3.1308              | -1.3738        | 2.4088         |
| <b>9</b>  | <b>1.8551</b>         | <b>-3.3205</b> | <b>-1.7933</b> | <b>3.5290</b>       | <b>2.1591</b>  | <b>0.8450</b>  | <b>3.6890</b>       | <b>1.8835</b>  | <b>0.9650</b>  |
| 10        | 3.1373                | -0.4519        | -2.6885        | 0.7726              | 3.8098         | 1.4600         | 1.0272              | 3.6233         | 1.7545         |
| 11        | 3.3575                | 2.2636         | 1.4081         | -2.3164             | 0.5963         | 3.5542         | -2.2400             | 0.4311         | 3.6168         |
| 12        | 1.9000                | -1.0742        | 3.5238         | 0.7768              | -2.2522        | 3.3858         | 0.6678              | -2.5698        | 3.1609         |
| 13        | 0.4835                | -3.9384        | 0.8109         | 3.8615              | -0.8308        | 0.9149         | 3.8137              | -1.1308        | 0.7674         |
| <b>14</b> | <b>1.2218</b>         | <b>-2.4679</b> | <b>-3.0489</b> | <b>2.7840</b>       | <b>3.0263</b>  | <b>-0.3371</b> | <b>2.9875</b>       | <b>2.8873</b>  | <b>-0.1313</b> |
| 15        | 2.9499                | 1.3671         | -2.7092        | -1.0426             | 3.9025         | 1.2400         | -0.7837             | 3.8372         | 1.5724         |
| 16        | 2.9499                | 1.3671         | 2.7092         | -1.5552             | -0.8154        | 3.8481         | -1.5664             | -1.0434        | 3.7801         |
| 17        | 1.2218                | -2.4679        | 3.0489         | 2.1948              | -2.2925        | 2.5994         | 2.0732              | -2.6324        | 2.3520         |
| <b>18</b> | <b>0.4835</b>         | <b>-3.9384</b> | <b>-0.8109</b> | <b>4.0228</b>       | <b>0.5850</b>  | <b>0.1333</b>  | <b>4.0671</b>       | <b>0.3343</b>  | <b>0.1115</b>  |
| 19        | 1.9000                | -1.0742        | -3.5238        | 1.4476              | 3.8877         | -0.0077        | 1.7001              | 3.7914         | 0.2904         |
| 20        | 3.3575                | 2.2636         | -1.4081        | -2.0493             | 3.0483         | 2.2001         | -1.8330             | 2.9680         | 2.4732         |
| 21        | 2.3660                | 3.4491         | 0.9142         | -3.4762             | 0.6557         | 2.4206         | -3.4098             | 0.6552         | 2.5141         |
| 22        | 0.7891                | 0.2135         | 4.0090         | -0.5767             | -3.0913        | 2.6147         | -0.7449             | -3.2577        | 2.3475         |
| 23        | -0.9428               | -3.5246        | 1.7418         | 3.3264              | -2.2935        | 0.1057         | 3.2014              | -2.5310        | -0.1530        |
| <b>24</b> | <b>-0.5878</b>        | <b>-2.6373</b> | <b>-3.0629</b> | <b>2.9152</b>       | <b>2.1506</b>  | <b>-1.9245</b> | <b>3.0393</b>       | <b>2.1346</b>  | <b>-1.7900</b> |
| 25        | 1.6157                | 1.7157         | -3.5717        | -1.3375             | 4.0436         | -0.3517        | -1.0848             | 4.1287         | 0.0050         |
| 26        | 1.6157                | 1.7157         | 3.5717         | -2.0164             | -2.1788        | 3.0892         | -2.1241             | -2.3085        | 2.9199         |
| 27        | -0.5878               | -2.6373        | 3.0629         | 2.3236              | -3.1894        | 1.0297         | 2.1393              | -3.4050        | 0.7210         |
| <b>28</b> | <b>-0.9428</b>        | <b>-3.5246</b> | <b>-1.7418</b> | <b>3.6674</b>       | <b>0.7466</b>  | <b>-1.5754</b> | <b>3.6948</b>       | <b>0.6597</b>  | <b>-1.5558</b> |
| 29        | 0.7891                | 0.2135         | -4.0090        | 0.1834              | 3.8898         | -1.2453        | 0.4166              | 3.9634         | -0.9194        |
| 30        | 2.3660                | 3.4491         | -0.9142        | -3.2986             | 2.2501         | 1.5398         | -3.1373             | 2.3068         | 1.7690         |
| 31        | -4.0665               | 0.4579         | 0.0000         | -0.5447             | -1.9163        | -3.5691        | -0.7014             | -1.5702        | -3.7034        |
| 32        | -3.7136               | 1.4806         | -1.4050        | -1.4231             | -0.4308        | -3.9646        | -1.4878             | -0.0068        | -3.9608        |
| 33        | -3.0110               | 2.8587         | -0.9162        | -2.8263             | -0.3918        | -3.1504        | -2.8795             | 0.0483         | -3.1284        |
| 34        | -3.0110               | 2.8587         | 0.9162         | -3.0040             | -1.9894        | -2.2672        | -3.1533             | -1.6044        | -2.3812        |
| 35        | -3.7136               | 1.4806         | 1.4050         | -1.6895             | -2.8768        | -2.6107        | -1.8976             | -2.5382        | -2.8178        |
| 36        | -3.9163               | -1.0994        | 0.0000         | 1.0090              | -1.9865        | -3.3969        | 0.8471              | -1.7462        | -3.5558        |
| 37        | -3.1336               | 0.6950         | -2.7106        | -0.5056             | 0.9140         | -4.0645        | -0.4874             | 1.2821         | -3.9595        |
| 38        | -1.7743               | 3.4976         | -1.7616        | -3.3556             | 0.9987         | -2.4912        | -3.3127             | 1.4078         | -2.3465        |
| <b>39</b> | <b>-1.7743</b>        | <b>3.4976</b>  | <b>1.7616</b>  | <b>-3.7024</b>      | <b>-2.0767</b> | <b>-0.7950</b> | <b>-3.8507</b>      | <b>-1.7761</b> | <b>-0.9129</b> |
| 40        | -3.1336               | 0.6950         | 2.7106         | -1.0180             | -3.8067        | -1.4535        | -1.2755             | -3.6000        | -1.7509        |
| 41        | -3.3497               | -2.0145        | -1.4286        | 2.0686              | -0.5533        | -3.5642        | 1.9907              | -0.3750        | -3.6052        |
| 42        | -1.9013               | 1.3288         | -3.5683        | -1.0286             | 2.3127         | -3.4157        | -0.9161             | 2.6504         | -3.1929        |

|           |                |                |               |                |                |                |                |                |                |
|-----------|----------------|----------------|---------------|----------------|----------------|----------------|----------------|----------------|----------------|
| 43        | -0.4238        | 4.0940         | -0.7819       | -4.0171        | 0.8472         | -0.8531        | -3.9713        | 1.1562         | -0.7184        |
| <b>44</b> | <b>-1.2036</b> | <b>2.7156</b>  | <b>3.0612</b> | <b>-3.0331</b> | <b>-3.0060</b> | <b>0.3517</b>  | <b>-3.2301</b> | <b>-2.8405</b> | <b>0.1399</b>  |
| 45        | -2.9507        | -1.1329        | 2.7292        | 0.8059         | -3.8989        | -1.2376        | 0.5427         | -3.8123        | -1.5683        |
| 46        | -2.9507        | -1.1329        | -2.7292       | 1.3222         | 0.8529         | -3.8648        | 1.3325         | 1.0935         | -3.7821        |
| 47        | -1.2036        | 2.7156         | -3.0612       | -2.4420        | 2.3341         | -2.5968        | -2.3165        | 2.6885         | -2.3530        |
| <b>48</b> | <b>-0.4238</b> | <b>4.0940</b>  | <b>0.7819</b> | <b>-4.1756</b> | <b>-0.5171</b> | <b>-0.0999</b> | <b>-4.2172</b> | <b>-0.2557</b> | <b>-0.0801</b> |
| 49        | -1.9013        | 1.3288         | 3.5683        | -1.7064        | -3.9050        | 0.0210         | -1.9582        | -3.7833        | -0.2825        |
| 50        | -3.3497        | -2.0145        | 1.4286        | 1.7982         | -3.0401        | -2.1901        | 1.5857         | -2.9444        | -2.4646        |
| 51        | -2.3246        | -3.1689        | -0.8834       | 3.1931         | -0.6378        | -2.3764        | 3.1256         | -0.6247        | -2.4558        |
| 52        | -0.7710        | 0.0461         | -4.0184       | 0.3175         | 3.1310         | -2.6107        | 0.4896         | 3.3183         | -2.3444        |
| 53        | 1.0197         | 3.8028         | -1.7614       | -3.5988        | 2.3707         | -0.0559        | -3.4453        | 2.5795         | 0.1943         |
| <b>54</b> | <b>0.6320</b>  | <b>2.9165</b>  | <b>3.0613</b> | <b>-3.1938</b> | <b>-2.1026</b> | <b>1.9542</b>  | <b>-3.3153</b> | <b>-2.0690</b> | <b>1.8173</b>  |
| 55        | -1.5968        | -1.4579        | 3.5512        | 1.0810         | -3.9922        | 0.3513         | 0.8287         | -4.0595        | -0.0005        |
| 56        | -1.5968        | -1.4579        | -3.5512       | 1.7565         | 2.1926         | -3.0700        | 1.8660         | 2.3383         | -2.9009        |
| 57        | 0.6320         | 2.9165         | -3.0613       | -2.6021        | 3.2350         | -0.9982        | -2.4034        | 3.4560         | -0.6875        |
| <b>58</b> | <b>1.0197</b>  | <b>3.8028</b>  | <b>1.7614</b> | <b>-3.9463</b> | <b>-0.7015</b> | <b>1.6440</b>  | <b>-3.9804</b> | <b>-0.6020</b> | <b>1.6372</b>  |
| 59        | -0.7710        | 0.0461         | 4.0184        | -0.4441        | -3.8657        | 1.2578         | -0.6759        | -3.9188        | 0.9290         |
| 60        | -2.3246        | -3.1689        | 0.8834        | 3.0230         | -2.1793        | -1.5261        | 2.8818         | -2.2506        | -1.7524        |
| 61        | 3.7491         | 0.5389         | 1.4142        | -0.5900        | 0.6223         | 3.9453         | -0.5092        | 0.3198         | 3.9797         |
| 62        | 2.0451         | -1.5344        | 1.8266        | 1.3986         | -0.7459        | 2.7067         | 1.3726         | -1.0544        | 2.5963         |
| 63        | 1.9162         | -3.4150        | 0.0000        | 3.4465         | 0.6122         | 1.7629         | 3.5212         | 0.2601         | 1.7391         |
| 64        | 2.0451         | -1.5344        | -1.8266       | 1.7525         | 2.4357         | 0.9457         | 1.9330         | 2.2590         | 1.1136         |
| 65        | 3.7491         | 0.5389         | -1.4142       | -0.3220        | 3.0855         | 2.5824         | -0.1016        | 2.8699         | 2.8270         |
| 66        | 1.6699         | 2.1801         | 1.8775        | -2.3232        | -0.6374        | 2.3081         | -2.3457        | -0.6934        | 2.2747         |
| 67        | 0.1571         | -1.2624        | 3.8176        | 0.8973         | -3.3656        | 2.0089         | 0.7034         | -3.5792        | 1.7021         |
| 68        | -0.9686        | -3.9594        | 0.0000        | 3.9263         | -0.8277        | -0.7459        | 3.8384         | -1.0067        | -0.8771        |
| 69        | 0.1571         | -1.2624        | -3.8176       | 1.6244         | 3.2878         | -1.6695        | 1.8180         | 3.3109         | -1.4119        |
| 70        | 1.6699         | 2.1801         | -1.8775       | -1.9586        | 2.6353         | 0.4994         | -1.7860        | 2.6937         | 0.7437         |
| 71        | -3.7306        | -0.2873        | -1.4186       | 0.3388         | -0.5858        | -3.9372        | 0.2611         | -0.2710        | -3.9718        |
| 72        | -2.0520        | 1.7657         | -1.8762       | -1.6268        | 0.8056         | -2.7433        | -1.6032        | 1.1310         | -2.6386        |
| 73        | -1.8075        | 3.6845         | 0.0000        | -3.7136        | -0.5367        | -1.6772        | -3.7667        | -0.1663        | -1.6613        |
| 74        | -2.0520        | 1.7657         | 1.8762        | -1.9909        | -2.4654        | -0.9358        | -2.1653        | -2.2539        | -1.1101        |
| 75        | -3.7306        | -0.2873        | 1.4186        | 0.0705         | -3.0571        | -2.5714        | -0.1467        | -2.8267        | -2.8146        |
| 76        | -1.6149        | -1.8551        | -1.8380       | 1.9943         | 0.6580         | -2.2481        | 2.0199         | 0.7306         | -2.1983        |
| 77        | -0.1438        | 1.5506         | -3.7376       | -1.1932        | 3.3262         | -1.9661        | -0.9963        | 3.5500         | -1.6656        |
| 78        | 1.0053         | 4.0139         | 0.0000        | -3.9809        | 0.8483         | 0.7760         | -3.9191        | 1.0188         | 0.9030         |
| 79        | -0.1438        | 1.5506         | 3.7376        | -1.9062        | -3.1847        | 1.6332         | -2.0935        | -3.1870        | 1.3822         |
| 80        | -1.6149        | -1.8551        | 1.8380        | 1.6396         | -2.5449        | -0.4789        | 1.4877         | -2.5997        | -0.7155        |
| <b>81</b> | <b>-0.2213</b> | <b>-1.7326</b> | <b>0.0000</b> | <b>1.7312</b>  | <b>-0.2585</b> | <b>-0.1439</b> | <b>1.7074</b>  | <b>-0.3560</b> | <b>-0.1404</b> |

### SII. The spin components of the equilibrium structure and the strained structures

During the investigation of the spin-dynamics processes in the Ni@B<sub>80</sub> structures, the initial and final states are selected based on the requirements of the  $\Lambda$  process. In principle, the initial and final states of a  $\Lambda$  process should be selected to be (or close to) the ground state. At the same time, the expectation values of the spin components for the selected states are better to be concentrated along one direction (z-axis in this manuscript) with the influence of the same magnetic field.

Table S4 lists the spin components of the equilibrium structure and the strained structures. Based on the spin components of the structures and the theoretical requirements of  $\Lambda$  process, we select states  $|1\rangle$  and  $|3\rangle$  as the initial and final states to achieve the spin-flip processes on Ni@B<sub>80</sub> structures, except for the structures with D1-type strains are applied. When the D1-type strains are applied, states  $|4\rangle$  and  $|6\rangle$  are selected as the initial and final states, respectively. The different selection for scenarios under D1-type strains is out of considering that the spin component  $\langle S_z \rangle$  of state  $|3\rangle$  lost its dominate position, which may lead to the difficulty in identifying the spin-flip processes. The spin components  $\langle S_z \rangle$  are 0.747 under 0.5% strain and 0.767 under 1.0% strain, while  $\langle S_y \rangle$  are up to 0.587 and 0.543 for 0.5% and 1.0% strains, respectively. Therefore, states  $|4\rangle$  and  $|6\rangle$  are selected for the spin-flip processes of the structures under D1-type strains. Besides, when 0.5% D3-type tensile strain is applied on the Ni@B<sub>80</sub> structures, the comparisons of  $\langle S_y \rangle$  versus  $\langle S_z \rangle$  are 0.358 vs. -0.914 and 0.266 vs. 0.877, for the initial and final states, respectively. The obvious differences between the spin components  $\langle S_y \rangle$  and  $\langle S_z \rangle$  do not influence the identification of the spin-flip processes. Therefore, states  $|1\rangle$  and  $|3\rangle$  are suitable for the structures under D3-type strains. As for scenarios in the equilibrium structure and the structures under D2-type strains, the values of  $\langle S_x \rangle$  and  $\langle S_y \rangle$  are zero, and the opposite  $\langle S_z \rangle$  values of states  $|1\rangle$  and  $|3\rangle$  make them almost the perfect initial and final states for the spin-flip processes.

**Table S4** The expectation values of spin components of low-lying substates on the equilibrium structure and the strained structures (the initial and final states are highlighted in bold).

| Structure             |      | State       | $\langle S_x \rangle$ | $\langle S_y \rangle$ | $\langle S_z \rangle$ | $\langle S \rangle$ |
|-----------------------|------|-------------|-----------------------|-----------------------|-----------------------|---------------------|
| Equilibrium structure |      | $ 1\rangle$ | 0.000                 | 0.000                 | <b>-0.451</b>         | 0.451               |
|                       |      | $ 2\rangle$ | 0.000                 | 0.000                 | 0.000                 | 0.000               |
|                       |      | $ 3\rangle$ | 0.000                 | 0.000                 | <b>0.360</b>          | 0.360               |
| D1                    | 0.5% | $ 1\rangle$ | -0.002                | 0.086                 | -0.996                | 0.999               |
|                       |      | $ 2\rangle$ | 0.016                 | -0.672                | 0.246                 | 0.716               |
|                       |      | $ 3\rangle$ | -0.014                | 0.587                 | 0.747                 | 0.950               |
|                       |      | $ 4\rangle$ | 0.008                 | 0.022                 | <b>-0.864</b>         | 0.864               |
|                       |      | $ 5\rangle$ | -0.021                | -0.055                | 0.000                 | 0.058               |
|                       |      | $ 6\rangle$ | 0.012                 | 0.031                 | <b>0.863</b>          | 0.864               |
|                       | 1.0% | $ 1\rangle$ | -0.002                | 0.167                 | -0.985                | 0.999               |
|                       |      | $ 2\rangle$ | 0.007                 | 0.710                 | 0.219                 | 0.743               |
|                       |      | $ 3\rangle$ | -0.006                | 0.543                 | 0.767                 | 0.940               |
|                       |      | $ 4\rangle$ | 0.016                 | 0.026                 | <b>-0.870</b>         | 0.870               |
|                       |      | $ 5\rangle$ | -0.039                | -0.061                | 0.000                 | 0.073               |
|                       |      | $ 6\rangle$ | 0.023                 | 0.035                 | <b>0.869</b>          | 0.870               |
| D2                    | 0.5% | $ 1\rangle$ | 0.000                 | 0.000                 | <b>-0.910</b>         | 0.910               |
|                       |      | $ 2\rangle$ | 0.000                 | 0.000                 | 0.000                 | 0.000               |
|                       |      | $ 3\rangle$ | 0.000                 | 0.000                 | <b>0.910</b>          | 0.910               |
|                       | 1.0% | $ 1\rangle$ | 0.000                 | 0.000                 | <b>-0.995</b>         | 0.995               |
|                       |      | $ 2\rangle$ | 0.000                 | 0.000                 | 0.000                 | 0.000               |
|                       |      | $ 3\rangle$ | 0.000                 | 0.000                 | <b>0.995</b>          | 0.995               |
| D3                    | 0.5% | $ 1\rangle$ | 0.014                 | 0.358                 | <b>-0.914</b>         | 0.982               |
|                       |      | $ 2\rangle$ | -0.024                | -0.624                | 0.037                 | 0.625               |



|  |      |             |        |        |               |       |
|--|------|-------------|--------|--------|---------------|-------|
|  |      | $ 3\rangle$ | 0.010  | 0.266  | <b>0.877</b>  | 0.916 |
|  | 1.0% | $ 1\rangle$ | -0.208 | 0.076  | <b>-0.673</b> | 0.708 |
|  |      | $ 2\rangle$ | 0.334  | -0.122 | 0.025         | 0.357 |
|  |      | $ 3\rangle$ | -0.126 | 0.047  | <b>0.648</b>  | 0.661 |

### III. Comparison between different basis sets for the Ni atom

In order to take the effect of using different basis sets for the Ni atom into account, we examine the spin-flip process on the equilibrium structure with triple-zeta Los Alamos basis set adopted for the Ni atom on Ni@B<sub>80</sub>. As listed in Table S5, among all five low-lying spin states we examined, the calculated spin density distributions on Ni atom do not show significant difference when we change the basis set from LanL2DZ to LanL2TZ. Fig. S1 shows the spin-flip processes achieved on Ni@B<sub>80</sub> with the double- and triple-zeta Los Alamos basis sets applied on Ni atom. Figs. S1 (a) and (b) in the left panel show the time-resolved occupations of each state with LanL2DZ and LanL2TZ basis set, respectively. The results show that both spin-flip processes can be achieved within 600 fs with less Rabi-like cycles, which demonstrates that the effect of using a triple- versus double-zeta basis set does not significantly influence the time consumption. Figs. S1 (c) and (d) in the right panel show the corresponding time-resolved expectation values of the spin components with two different basis sets. The spin components  $\langle S_x \rangle$  and  $\langle S_y \rangle$  almost do not contribute to the expectation value of the total spin during the spin-flip processes. In the case using the LanL2DZ basis set, the opposite spin components  $\langle S_z \rangle$  of the initial state ( $-0.451$ ) and the final state ( $0.360$ ) show the reversal of the spin direction. Similarly, in the case using the LanL2TZ basis set, the same spin direction reversal can also be found with the values  $-0.585$  and  $0.701$  for the initial state and the final state, respectively. The reversals of the spin direction indicate the spin-flip scenarios are both achieved, and the using of the triple-zeta versus double-zeta does not influence the achievement of the spin-flip process.

Additionally, Table S6 lists the optimized parameters of the adopted laser pulses with using the LanL2DZ and LanL2TZ basis sets, respectively. In the scenario of using LanL2TZ basis set for the Ni atom, the fidelity of the spin-flip process reaches to 99.0%, and the energy of the adopted laser pulse is 2.94 eV. Although the different laser pulses are adopted, both of the ultrafast spin-flip processes achieved with high fidelities. Without compromising the accuracy of main conclusions in our present work, these results partially explain why the effects of changing a larger basis set (LanL2TZ) for the Ni atom are negligible. There is no doubt that a triple-zeta basis set considers more orbitals to address the higher accuracy, but a double-zeta basis set is adopted in our manuscript as a tradeoff between the accuracy and the efficiency.

**Table S5** Calculated Mulliken spin density (without SOC) of the lowest five triplet states on Ni atom of Ni@B<sub>80</sub> equilibrium structure with adopting different basis sets for the Ni atom.

| Basis Set | State 1 | State 2 | State 3 | State 4 | State 5 |
|-----------|---------|---------|---------|---------|---------|
| LanL2DZ   | 1.591   | 0.982   | 0.983   | 0.978   | 0.963   |
| LanL2TZ   | 1.670   | 1.110   | 1.131   | 1.006   | 0.951   |

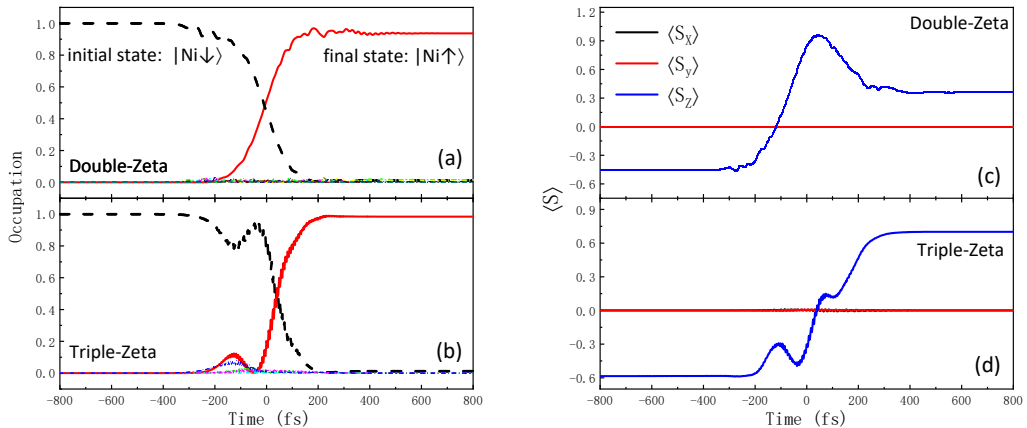

**Fig. S1** Spin-flip processes achieved on Ni@B<sub>80</sub> with adopting different basis sets for the Ni atom. Left panel: Time-resolved occupation of the initial (dashed black line), the final (solid red line), and the intermediate (dash-dotted line) states with adopting (a) LanL2DZ and (b) LanL2TZ basis sets, respectively. Right panel: Time-resolved expectation values of the spin components with adopting (c) LanL2DZ and (d) LanL2TZ basis sets, respectively. The corresponding basis sets are denoted as Double-Zeta (for LanL2DZ) and Triple-Zeta (for LanL2TZ), respectively.

**Table S6** Optimized laser parameters of each  $\Lambda$  process in the Ni@B<sub>80</sub> with adopting different basis sets for the Ni atom.  $\theta$  and  $\varphi$  represent the angles of incidence in spherical coordinates, and  $\mathcal{V}$  is the angle between the linearly polarized light and the optical plane. FWHM is the full width at half maximum of the laser pulse.

| Basis Set | Fidelity (%) | $\theta(^{\circ})$ | $\varphi(^{\circ})$ | $\gamma(^{\circ})$ | FWHM (fs) | Energy (eV) |
|-----------|--------------|--------------------|---------------------|--------------------|-----------|-------------|
| LanL2DZ   | 96.6         | 181.58             | 258.30              | 226.28             | 299.71    | 2.41        |
| LanL2TZ   | 99.0         | 196.36             | 36.60               | 332.90             | 300.00    | 2.94        |
